# Supplementary material for: Induction of Apoptosis in Human Breast Adenocarcinoma Cells MCF-7 by Monapurpyridine A, a New Azaphilone Derivative from Monascus purpureus NTU 568
Source: Molecules. 2012 Jan 11;17(1):664–73. doi: 10.3390/molecules17010664 (PMC6268682; doi:10.3390/molecules17010664)

*Molecules* **2012**, *17*,664-673; doi:10.3390/molecules17010664

**OPEN ACCESS**

molecules

**ISSN 1420-3049**

www.mdpi.com/journal/molecules

*Article*

Induction of Apoptosis in Human Breast Adenocarcinoma Cells MCF-7 by Monapurpyridine A, a New Azaphilone Derivative from *Monascus purpureus* NTU 568

Li-Chuan Hsu 1,2, Ya-Wen Hsu 1,2, Yu-Han Liang 1,2, Chia-Ching Liaw 2, Yao-Haur Kuo 2,3,* and Tzu-Ming Pan 1,*

1 [Department of Biochemical Science and Technology](http://www.bst.ntu.edu.tw/BSTe.htm), National Taiwan University, Taipei 10617, Taiwan

2 Division of Herbal Drugs and Natural Products, National Research Institute of Chinese Medicine, Taipei 11221, Taiwan

3 **Graduate Institute of Integrated Medicine**, China Medical University, Taichung 40402, Taiwan

***** Authors to whom correspondence should be addressed; E-Mails: [kuoyh@nricm.edu.tw](mailto:kuoyh@nricm.edu.tw) (Y.-H.K.); [tmpan@ntu.edu.tw](mailto:tmpan@ntu.edu.tw) (T.-M.P.); Tel.: +886-2-2820-1999 ext. 7061 (Y.-H.K.);
Fax: +886-2-2823-6150 (Y.-H.K.); Tel.: +886-2-3366-4519 ext. 10 (T.-M.P.);
Fax: +886-2-3366-3838 (T.-M.P.).

Received: 21 November 2011; in revised form: 6 January 2012 / Accepted: 6 January 2012 /
Published: 11 January 2012

**Figure 1.** The 1H-NMR spectrum of monapurpyridine A in CDCl3.

**Figure 2.** The 13C-NMR spectrum of monapurpyridine A in CDCl3.


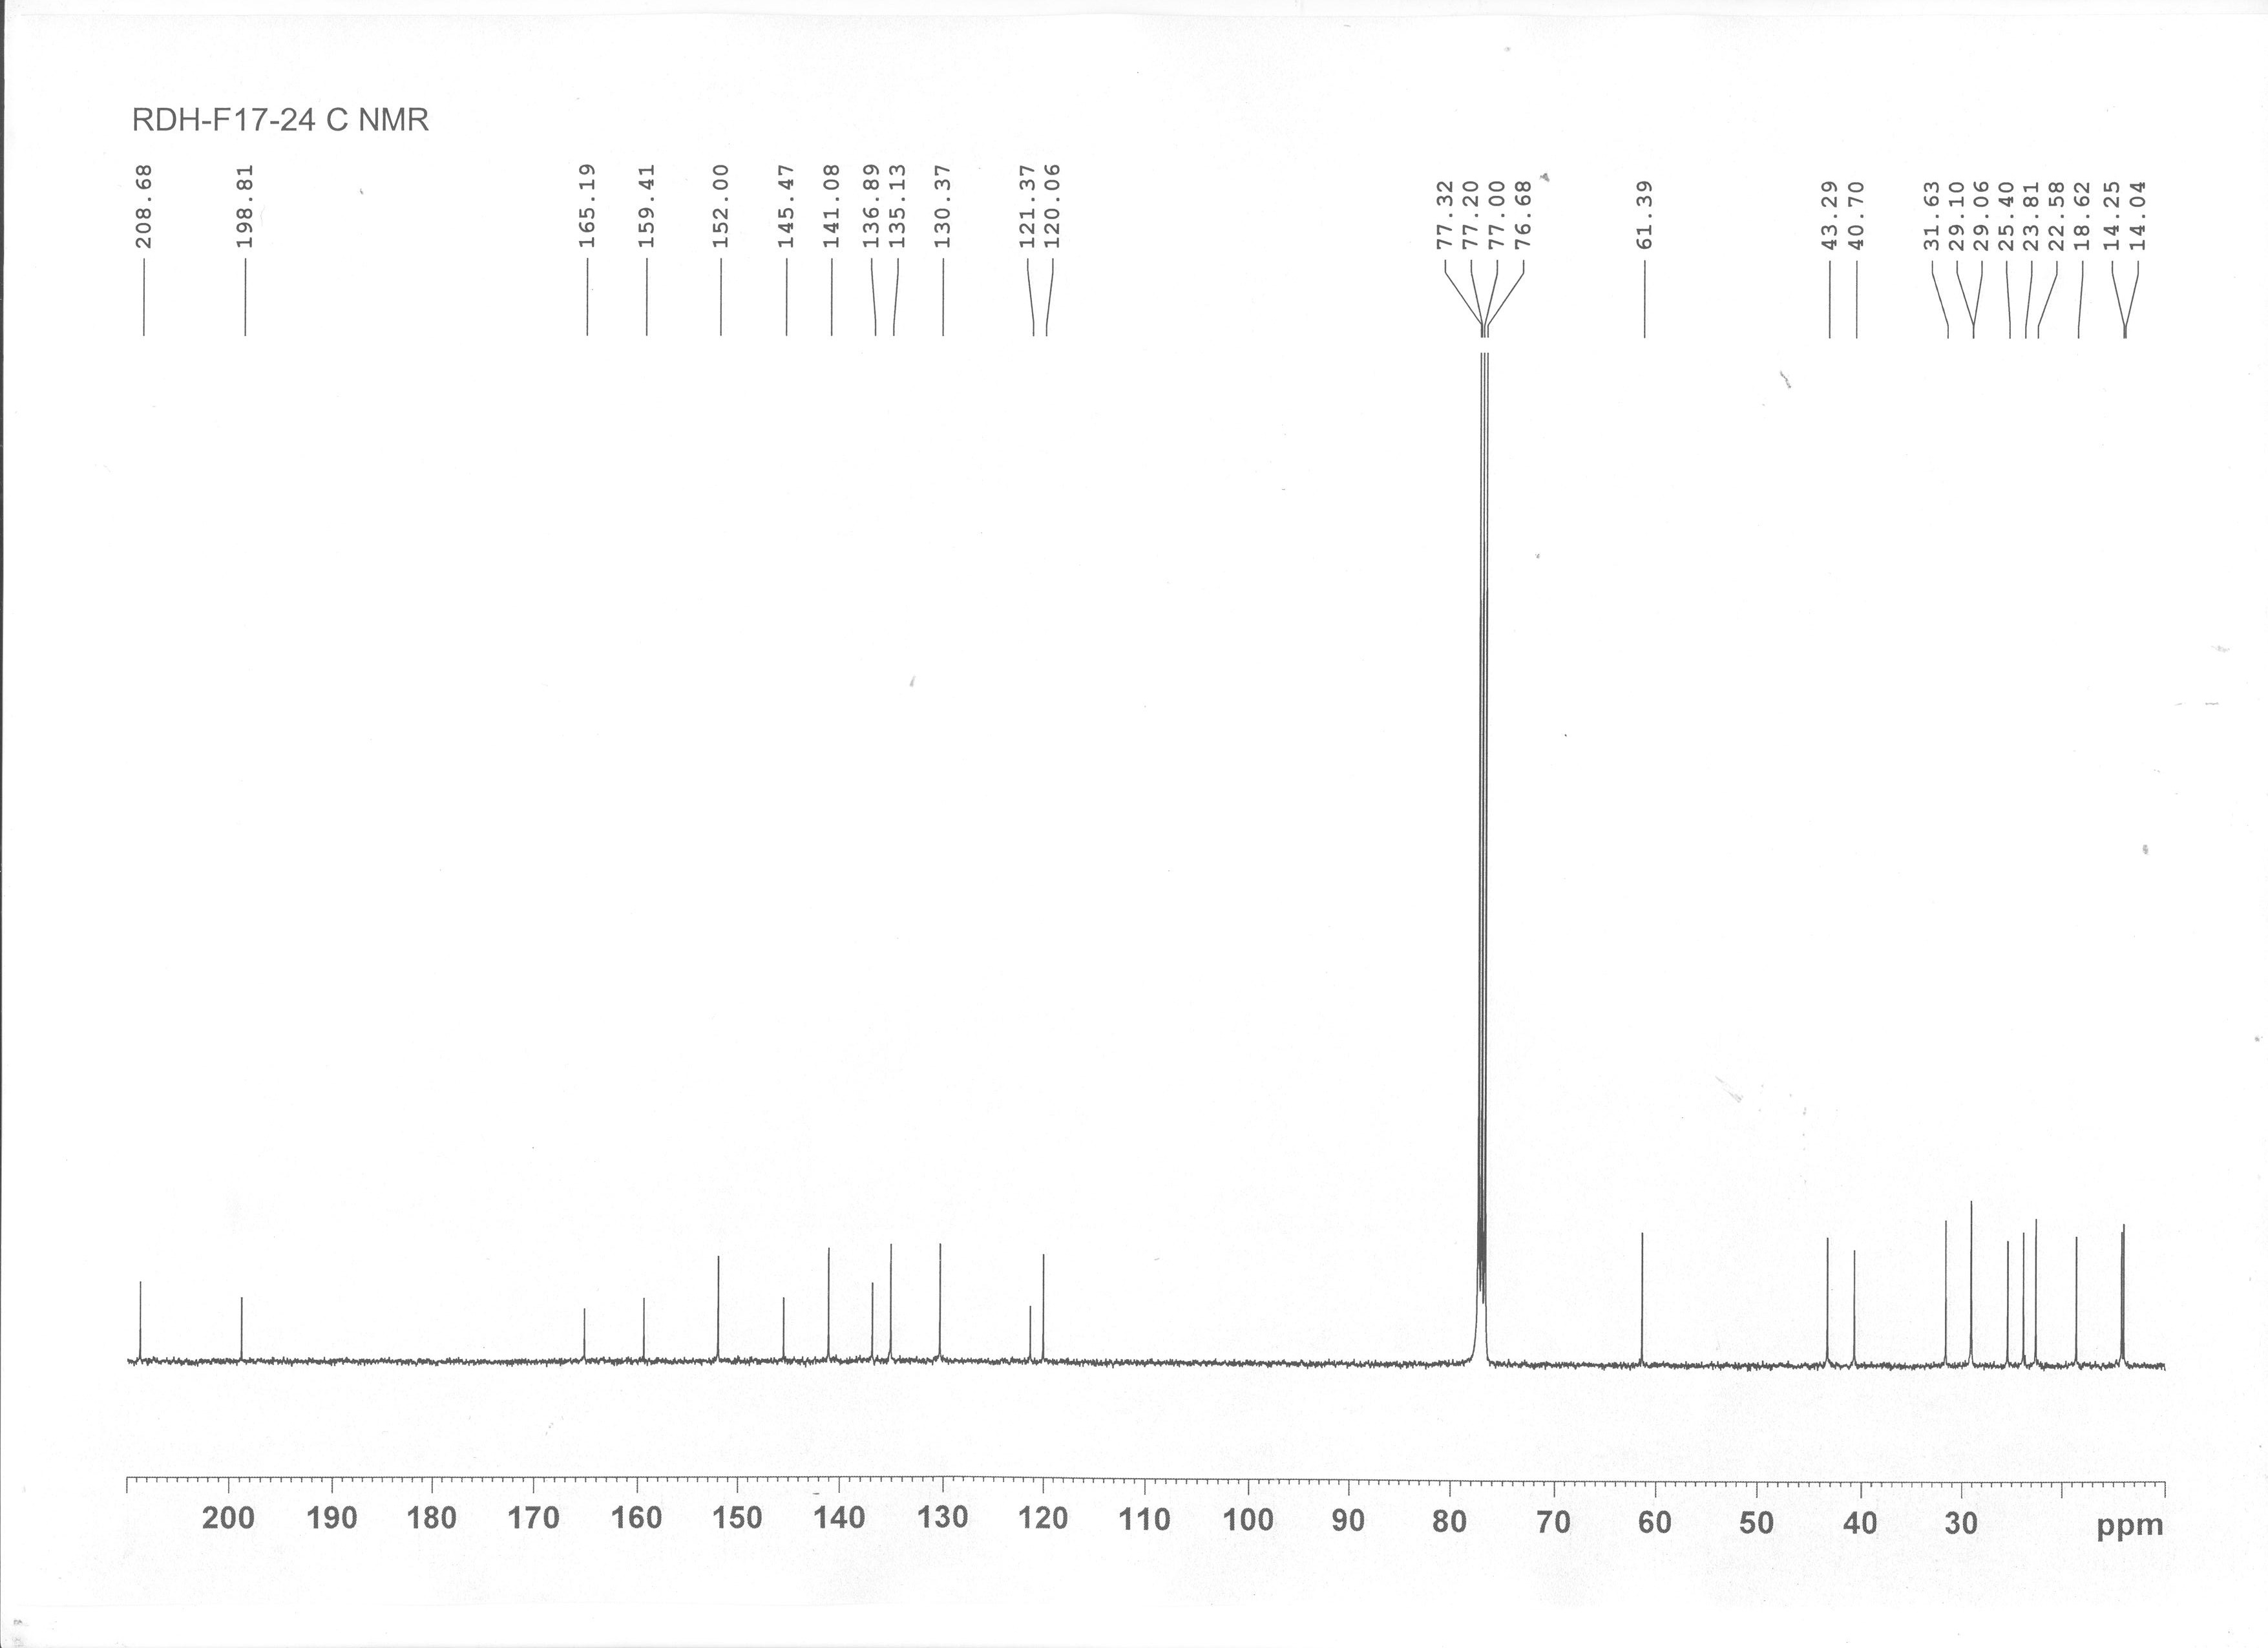

Supplement: Supplementary file 1 [file molecules-17-00664-s001.doc]
